# Supplementary material for: Seasonal and Geographic Variation in Alkaloid Content of Kratom (Mitragyna speciosa (Korth.) Havil.) from Thailand
Source: MDPI journal article supplement (doi:10.3390/plants12040949), 2023-02-19
Supplement: s1 [file s1]

## Supplementary Figures

### Seasonal and Geographic Variation in Alkaloid Content of Kratom (*Mitragyna speciosa* (Korth.) Havil.) from Thailand

Narumon Sengnon <sup>1</sup>, Phanita Vonghirundecha <sup>1</sup>, Wiraphon Chaichan <sup>2</sup>,  
Thaweesak Juengwatanatrakul <sup>3</sup>, Jumpen Onthong<sup>4</sup>, Pongmanat Kitprasong<sup>4</sup>, Somchai Sriwiriyan <sup>5</sup>,  
Somsorn Chittrakarn <sup>5</sup>, Supattra Limsuwanchote <sup>5</sup>, and Juraithip Wungsintaweekul <sup>1,\*</sup>

- <sup>1</sup> Department of Pharmacognosy and Pharmaceutical Botany, Faculty of Pharmaceutical Sciences, Prince of Songkla University, Hat Yai campus, Songkhla 90112, Thailand
  - <sup>2</sup> Narcotic Crops Survey and Monitoring Institute, Office of the Narcotics Control Board, City Hall, Muang, Chiang Mai 50303, Thailand
  - <sup>3</sup> Faculty of Pharmaceutical Sciences, Ubon Ratchathani University, Warinchamrab District, Ubon Ratchathani 34190, Thailand
  - <sup>4</sup> Agricultural Innovation and Management Division, Faculty of Natural Resources, Prince of Songkla University, Hat Yai campus, Songkhla 90110, Thailand
  - <sup>5</sup> Division of Health and Applied Sciences, Faculty of Science, Prince of Songkla University, Hat Yai campus, Songkhla 90110, Thailand
- \* Correspondence: juraithip.w@psu.ac.th; Tel.: +66-815980868

**Figure S1.** Protocol of kratom collection suggested by the Narcotic Crop Survey and Monitoring Institute (NCS), the Office of Narcotic Control Board (ONCB).

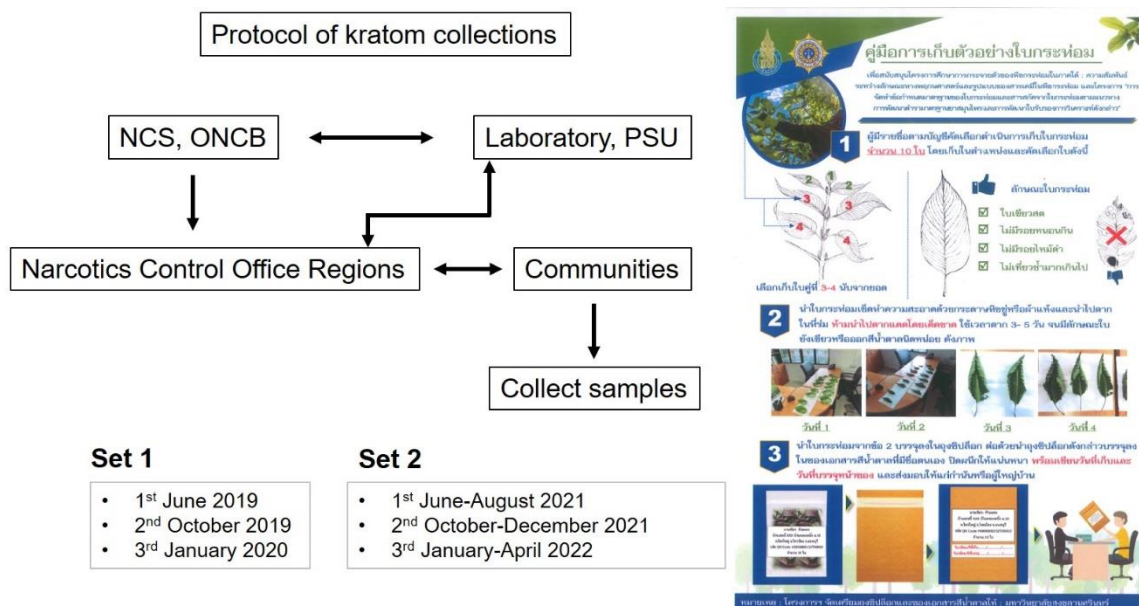

**Figure S2.**

Kratom specimens from Nam Phu subdistrict, Ban Na San, Surat Thani, Thailand, deposited in the PSU herbarium, Department of Biology, Faculty of Science, Prince of Songkla University, Songkhla, Thailand.

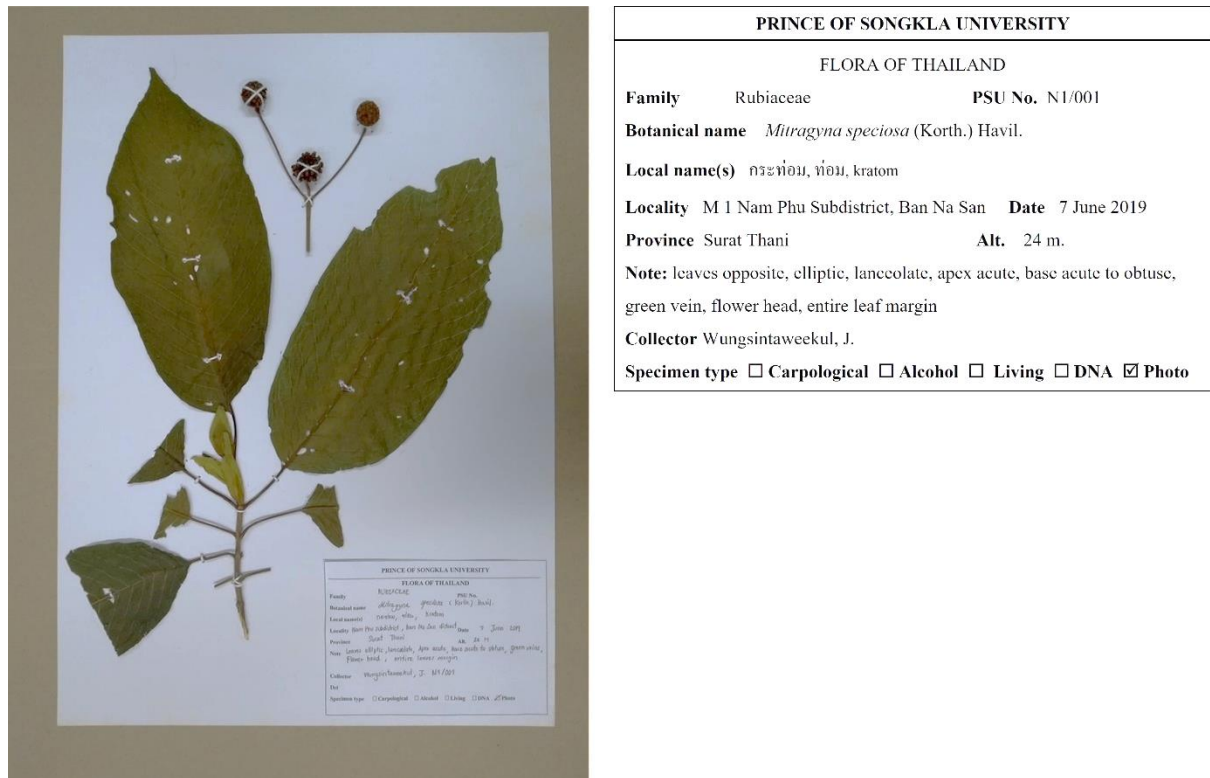

Figure S2 (continue)

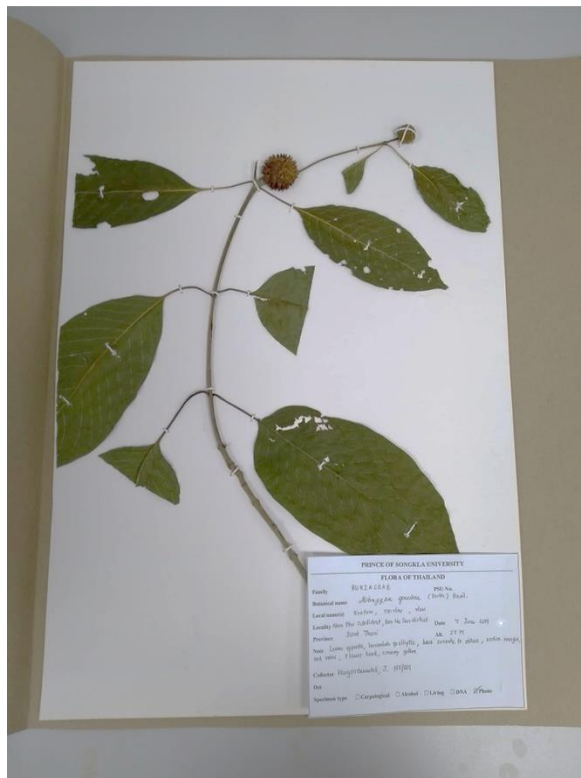

| PRINCE OF SONGKLA UNIVERSITY                                                                                                      |                                                                                                                                                                               |                         |
|-----------------------------------------------------------------------------------------------------------------------------------|-------------------------------------------------------------------------------------------------------------------------------------------------------------------------------|-------------------------|
| FLORA OF THAILAND                                                                                                                 |                                                                                                                                                                               |                         |
| <b>Family</b>                                                                                                                     | Rubiaceae                                                                                                                                                                     | <b>PSU No.</b> N5/001   |
| <b>Botanical name</b>                                                                                                             | <i>Mitragyna speciosa</i> (Korth.) Havil.                                                                                                                                     |                         |
| <b>Local name(s)</b>                                                                                                              | กระต๊อม, ท້อม, kratom                                                                                                                                                         |                         |
| <b>Locality</b>                                                                                                                   | M5 Nam Phu Subdistrict, Ban Na San                                                                                                                                            | <b>Date</b> 7 June 2019 |
| <b>Province</b>                                                                                                                   | Surat Thani                                                                                                                                                                   | <b>Alt.</b> 27 m.       |
| <b>Note:</b> leaves opposite, elliptic, lanceolate, apex acute, base cuneate to obtuse, red vein, flower head, entire leaf margin |                                                                                                                                                                               |                         |
| <b>Collector</b> Wungsintaweekul, J.                                                                                              |                                                                                                                                                                               |                         |
| <b>Specimen type</b>                                                                                                              | <input type="checkbox"/> Carpological <input type="checkbox"/> Alcohol <input type="checkbox"/> Living <input type="checkbox"/> DNA <input checked="" type="checkbox"/> Photo |                         |

Figure S2 (continue)

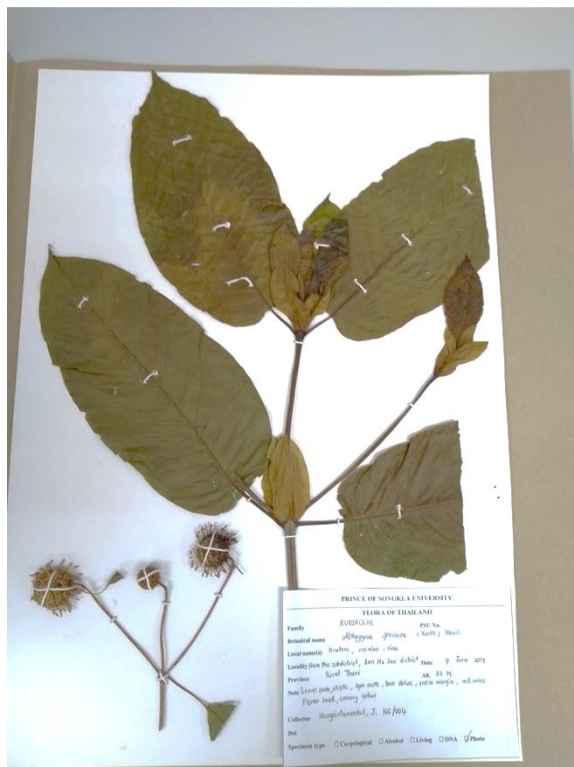

| PRINCE OF SONGKLA UNIVERSITY                                                                            |                                                                                                                                                                               |                         |
|---------------------------------------------------------------------------------------------------------|-------------------------------------------------------------------------------------------------------------------------------------------------------------------------------|-------------------------|
| FLORA OF THAILAND                                                                                       |                                                                                                                                                                               |                         |
| <b>Family</b>                                                                                           | Rubiaceae                                                                                                                                                                     | <b>PSU No.</b> N6/004   |
| <b>Botanical name</b>                                                                                   | <i>Mitragyna speciosa</i> (Korth.) Havil.                                                                                                                                     |                         |
| <b>Local name(s)</b>                                                                                    | กระต๊อม, ท້อม, kratom                                                                                                                                                         |                         |
| <b>Locality</b>                                                                                         | M 6 Nam Phu Subdistrict, Ban Na San                                                                                                                                           | <b>Date</b> 7 June 2019 |
| <b>Province</b>                                                                                         | Surat Thani                                                                                                                                                                   | <b>Alt.</b> 32 m.       |
| <b>Note:</b> leaves opposite, ovate, apex acute, base obtuse, red vein, flower head, entire leaf margin |                                                                                                                                                                               |                         |
| <b>Collector</b> Wungsintaweekul, J.                                                                    |                                                                                                                                                                               |                         |
| <b>Specimen type</b>                                                                                    | <input type="checkbox"/> Carpological <input type="checkbox"/> Alcohol <input type="checkbox"/> Living <input type="checkbox"/> DNA <input checked="" type="checkbox"/> Photo |                         |

Figure S2 (continue)

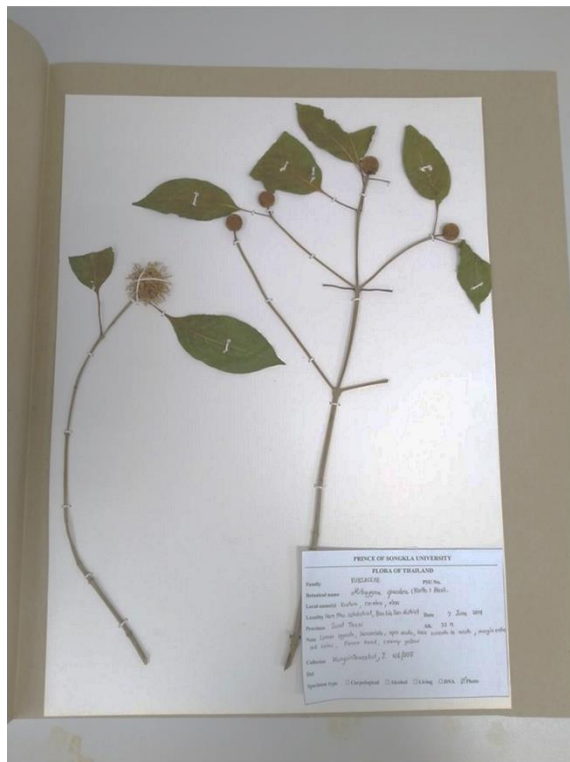

| PRINCE OF SONGKLA UNIVERSITY                                                                                     |                                                                                                                                                                               |                  |
|------------------------------------------------------------------------------------------------------------------|-------------------------------------------------------------------------------------------------------------------------------------------------------------------------------|------------------|
| FLORA OF THAILAND                                                                                                |                                                                                                                                                                               |                  |
| Family                                                                                                           | Rubiaceae                                                                                                                                                                     | PSU No. N6/005   |
| Botanical name                                                                                                   | <i>Mitragyna speciosa</i> (Korth.) Havil.                                                                                                                                     |                  |
| Local name(s)                                                                                                    | กระต่อม, ท่อม, kratom                                                                                                                                                         |                  |
| Locality                                                                                                         | M 6 Nam Phu Subdistrict, Ban Na San                                                                                                                                           | Date 7 June 2019 |
| Province                                                                                                         | Surat Thani                                                                                                                                                                   | Alt. 33 m.       |
| Note: leaves opposite, lanceolate, apex acute, base cuneate, red and green vein, flower head, entire leaf margin |                                                                                                                                                                               |                  |
| Collector                                                                                                        | Wungsintaweekul, J.                                                                                                                                                           |                  |
| Specimen type                                                                                                    | <input type="checkbox"/> Carpological <input type="checkbox"/> Alcohol <input type="checkbox"/> Living <input type="checkbox"/> DNA <input checked="" type="checkbox"/> Photo |                  |

Figure S2 (continue)

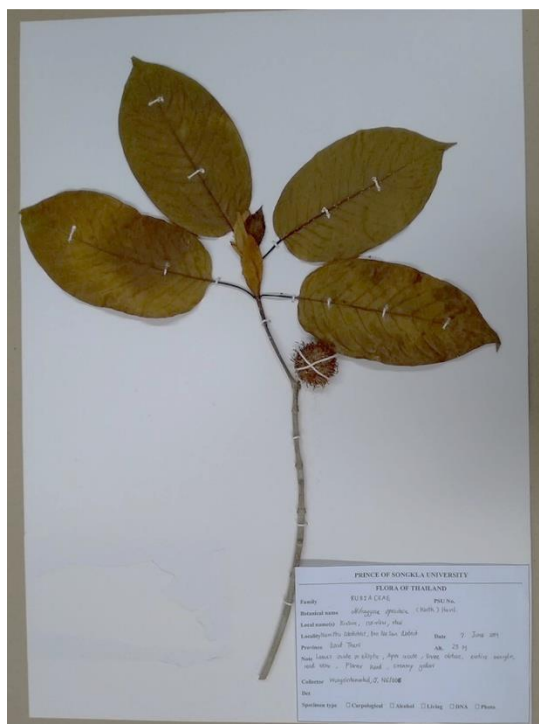

| PRINCE OF SONGKLA UNIVERSITY                                                                               |                                                                                                                                                                               |                  |
|------------------------------------------------------------------------------------------------------------|-------------------------------------------------------------------------------------------------------------------------------------------------------------------------------|------------------|
| FLORA OF THAILAND                                                                                          |                                                                                                                                                                               |                  |
| Family                                                                                                     | Rubiaceae                                                                                                                                                                     | PSU No. N6/006   |
| Botanical name                                                                                             | <i>Mitragyna speciosa</i> (Korth.) Havil.                                                                                                                                     |                  |
| Local name(s)                                                                                              | กระต่อม, ท่อม, kratom                                                                                                                                                         |                  |
| Locality                                                                                                   | M 6 Nam Phu Subdistrict, Ban Na San                                                                                                                                           | Date 7 June 2019 |
| Province                                                                                                   | Surat Thani                                                                                                                                                                   | Alt. 23 m.       |
| Note: leaves opposite, ovate, elliptic, apex acute, base obtuse, red vein, flower head, entire leaf margin |                                                                                                                                                                               |                  |
| Collector                                                                                                  | Wungsintaweekul, J.                                                                                                                                                           |                  |
| Specimen type                                                                                              | <input type="checkbox"/> Carpological <input type="checkbox"/> Alcohol <input type="checkbox"/> Living <input type="checkbox"/> DNA <input checked="" type="checkbox"/> Photo |                  |

**Figure S3.** The isolation protocol and chemical characteristics for mitragynine (MG), paynantheine (PAY), and speciogynine (SG).

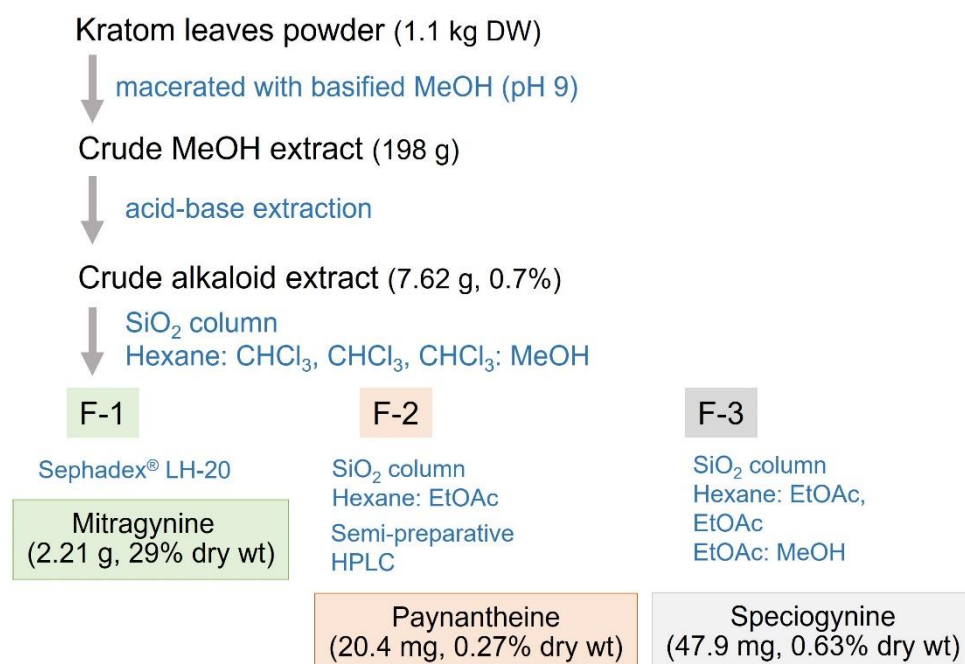

**Mitragynine:** see in [36].

**Paynantheine:** a pale yellowish amorphous solid; <sup>1</sup>H-NMR (500 MHz, CDCl<sub>3</sub>) δ: 7.70 (1H, br-s, N-H), 7.31 (1H, s, H-17), 6.98 (1H, dd, *J* = 8.01, 7.77 Hz, H-11), 6.87 (1H, dd, *J* = 8.00, 0.69 Hz, H-12), 6.45 (1H, d, *J* = 7.77 Hz, H-10), 5.55 (1H, dd, *J* = 17.8, 9.83 Hz, H-19), 5.00 (1H, dd, *J* = 17.15, 1.38 Hz, H-18), 4.94 (1H, dd, *J* = 10.29, 2.06 Hz, H-18), 3.85 (3H, s, 9-OCH<sub>3</sub>), 3.76 (3H, s, 17-OCH<sub>3</sub>), 3.67 (3H, s, 22-OCH<sub>3</sub>), 3.30 (1H, br-d, *J* = 10.51 Hz, H-3), 3.17 (1H, m, H-5), 3.07-2.97 (4H, m, H-6, H-20, H-21), 2.74 (1H, td, *J* = 11.66, 3.66 Hz, H-15), 2.58 (1H, td, *J* = 11.44, 4.34 Hz, H-5), 2.27 (1H, t, *J* = 10.75 Hz, H-21), 2.10 (1H, br-q, *J* = 11.89 Hz, H-14), 1.95 (1H, br-d, *J* = 12.35 Hz, H-14); <sup>13</sup>C-NMR (125 MHz, CDCl<sub>3</sub>) δ: 169.3 (C-22), 159.9 (C-17), 154.5 (C-9), 139.3 (C-19), 137.3 (C-13), 132.9 (C-2), 121.9 (C-11), 117.5 (C-8), 115.6 (C-18), 110.1 (C-16), 107.8 (C-7), 104.2 (C-12), 99.7 (C-10), 61.6 (17-OCH<sub>3</sub>), 60.8 (C-21), 59.9 (C-3), 55.3 (9-OCH<sub>3</sub>), 53.1 (C-5), 51.3 (22-OCH<sub>3</sub>), 42.7 (C-20), 38.4 (C-15), 33.3 (C-14), 23.6 (C-6); EI-MS *m/z* 396 (M<sup>+</sup>).

**Speciogynine:** a colorless crystal; <sup>1</sup>H-NMR (500 MHz, CDCl<sub>3</sub>) δ: 7.68 (1H, br-s, N-H), 7.34 (1H, br-s, H-17), 6.97 (1H, dd, *J* = 8.22, 7.78 Hz, H-11), 6.86 (1H, d, *J* = 7.77 Hz, H-12), 6.44 (1H, d, *J* = 7.77 Hz, H-10), 3.85 (3H, s, 9-OCH<sub>3</sub>), 3.71 (6H, br-s, 17-OCH<sub>3</sub>, 22-OCH<sub>3</sub>), 3.19 (2H, m, H-6, H-21), 3.15 (1H, m, H-3), 3.07 (1H, br, H-5), 3.00 (1H, br-d, *J* = 15.1 Hz, H-6), 2.60-2.58 (2H, m, H-5, H-20), 2.26 (1H, br, H-15), 2.06 (1H, br, H-21), 1.95 (1H, br, H-14), 1.86 (1H, br, H-14), 1.40 (1H, br, H-19), 1.02 (1H, br, H-19), 0.84 (3H, t, *J* = 7.32, 7.5 Hz, H-18); <sup>13</sup>C-NMR (125 MHz, CDCl<sub>3</sub>) δ: 169.4 (C-22), 159.9 (C-17), 154.5 (C-9), 137.3 (C-13), 132.9 (C-2), 121.8 (C-11), 117.5 (C-8), 111.6 (C-16), 107.7 (C-7), 104.2 (C-12), 99.7 (C-10), 61.7 (17-OCH<sub>3</sub>), 60.9 (C-21), 60.3 (C-3), 55.3 (9-OCH<sub>3</sub>), 53.6 (C-5), 51.6 (22-OCH<sub>3</sub>), 39.9 (C-20), 38.8 (C-15), 33.7 (C-14), 24.4 (C-19), 23.7 (C-6), 11.4 (C-18); EI-MS *m/z* 398 (M<sup>+</sup>).



## Supplementary Tables

### Seasonal and Geographic Variation in Alkaloid Content of Kratom [*Mitragyna speciosa* (Korth.) Havil.] from Thailand

Narumon Sengnon <sup>1</sup>, Phanita Vonghirundecha <sup>1</sup>, Wiraphon Chaichan <sup>2</sup>, Thaweesak Juengwatanatrakul <sup>3</sup>, Jumpen Onthong <sup>4</sup>, Pongmanat Kitprasong <sup>4</sup>, Somchai Sriwiriyan <sup>5</sup>, Somsmorn Chittrakarn <sup>5</sup>, Supattra Limsuwanchote <sup>5</sup>, and Juraithip Wungsintaweekul <sup>1,\*</sup>

<sup>1</sup> Department of Pharmacognosy and Pharmaceutical Botany, Faculty of Pharmaceutical Sciences, Prince of Songkla University, Hat Yai campus, Songkhla 90112, Thailand

<sup>2</sup> Narcotic Crops Survey and Monitoring Institute, Office of the Narcotics Control Board, City Hall, Muang, Chiang Mai 50303, Thailand

<sup>3</sup> Faculty of Pharmaceutical Sciences, Ubon Ratchathani University, Warinchamrab District, Ubon Ratchathani 34190, Thailand

<sup>4</sup> Agricultural Innovation and Management Division, Faculty of Natural Resources, Prince of Songkla University, Hat Yai campus, Songkhla 90110, Thailand

<sup>5</sup> Division of Health and Applied Sciences, Faculty of Science, Prince of Songkla University, Hat Yai campus, Songkhla 90110, Thailand

\* Correspondence: juraithip.w@psu.ac.th; Tel.: +66-815980868

**Table S1.** Set 1 of samples collected from Nam Phu subdistrict, Ban Na San, Surat Thani, Thailand from June 2019-January 2020.

| Province    | District   | Subdistrict | Village <sup>a</sup> | Sample code <sup>b</sup> | QR code <sup>c</sup> | Leaf vein color |
|-------------|------------|-------------|----------------------|--------------------------|----------------------|-----------------|
| Surat Thani | Ban Na San | Nam Phu     | M1                   | M1-1                     | H0000011480T00001    | green           |
| Surat Thani | Ban Na San | Nam Phu     | M1                   | M1-2                     | H0000011511T00001    | green           |
| Surat Thani | Ban Na San | Nam Phu     | M2                   | M2-1                     | H0000010469T00002    | red             |
| Surat Thani | Ban Na San | Nam Phu     | M3                   | M3-1                     | H0000010727T00001    | red             |
| Surat Thani | Ban Na San | Nam Phu     | M3                   | M3-2                     | n.d.                 | green           |
| Surat Thani | Ban Na San | Nam Phu     | M3                   | M3-3                     | H0000010696T00001    | red             |
| Surat Thani | Ban Na San | Nam Phu     | M3                   | M3-4                     | H0000010765T00001    | red             |
| Surat Thani | Ban Na San | Nam Phu     | M3                   | M3-5                     | H0000010700T00002    | red             |
| Surat Thani | Ban Na San | Nam Phu     | M4                   | M4-1                     | H0000010418T00001    | green           |
| Surat Thani | Ban Na San | Nam Phu     | M4                   | M4-2                     | H0000010488T00002    | green           |
| Surat Thani | Ban Na San | Nam Phu     | M4                   | M4-3                     | H0000010432T00001    | green           |
| Surat Thani | Ban Na San | Nam Phu     | M4                   | M4-4                     | H0000010500T00001    | green           |
| Surat Thani | Ban Na San | Nam Phu     | M4                   | M4-5                     | H0000010429T00002    | green           |

|             |            |         |    |       |                   |       |
|-------------|------------|---------|----|-------|-------------------|-------|
| Surat Thani | Ban Na San | Nam Phu | M4 | M4-6  | H0000010538T00002 | green |
| Surat Thani | Ban Na San | Nam Phu | M4 | M4-7  | H0000010516T00001 | green |
| Surat Thani | Ban Na San | Nam Phu | M5 | M5-1  | H0000010483T00003 | red   |
| Surat Thani | Ban Na San | Nam Phu | M5 | M5-2  | H0000010504T00001 | green |
| Surat Thani | Ban Na San | Nam Phu | M5 | M5-3  | H0000010596T00003 | green |
| Surat Thani | Ban Na San | Nam Phu | M5 | M5-4  | H0000010523T00001 | green |
| Surat Thani | Ban Na San | Nam Phu | M5 | M5-5  | H0000010580T00002 | red   |
| Surat Thani | Ban Na San | Nam Phu | M5 | M5-6  | H0000010510T00004 | green |
| Surat Thani | Ban Na San | Nam Phu | M5 | M5-7  | H0000010525T00003 | green |
| Surat Thani | Ban Na San | Nam Phu | M5 | M5-8  | H0000010572T00001 | green |
| Surat Thani | Ban Na San | Nam Phu | M5 | M5-9  | H0000010452T00004 | red   |
| Surat Thani | Ban Na San | Nam Phu | M5 | M5-10 | H0000010482T00006 | green |
| Surat Thani | Ban Na San | Nam Phu | M6 | M6-1  | H0000010345T00003 | green |
| Surat Thani | Ban Na San | Nam Phu | M6 | M6-2  | H0000010345T00002 | red   |
| Surat Thani | Ban Na San | Nam Phu | M6 | M6-3  | H0000010293T00002 | green |
| Surat Thani | Ban Na San | Nam Phu | M6 | M6-4  | H0000010293T00001 | green |
| Surat Thani | Ban Na San | Nam Phu | M6 | M6-5  | H0000010219T00001 | red   |
| Surat Thani | Ban Na San | Nam Phu | M6 | M6-6  | H0000010219T00002 | green |
| Surat Thani | Ban Na San | Nam Phu | M6 | M6-7  | H0000010290T00001 | green |
| Surat Thani | Ban Na San | Nam Phu | M6 | M6-8  | H0000010339T00003 | green |
| Surat Thani | Ban Na San | Nam Phu | M6 | M6-9  | H0000010275T00001 | green |
| Surat Thani | Ban Na San | Nam Phu | M6 | M6-10 | H0000010371T00003 | red   |
| Surat Thani | Ban Na San | Nam Phu | M6 | M6-11 | H0000010269T00003 | green |
| Surat Thani | Ban Na San | Nam Phu | M6 | M6-12 | H0000010322T00001 | red   |
| Surat Thani | Ban Na San | Nam Phu | M6 | M6-13 | H0000010366T00001 | red   |
| Surat Thani | Ban Na San | Nam Phu | M1 | M1-3  | H0000011525T00001 | green |
| Surat Thani | Ban Na San | Nam Phu | M1 | M1-4  | H0000011596T00003 | green |
| Surat Thani | Ban Na San | Nam Phu | M1 | M1-5  | H0000011527T00002 | green |
| Surat Thani | Ban Na San | Nam Phu | M1 | M1-6  | H0000011590T00001 | green |
| Surat Thani | Ban Na San | Nam Phu | M1 | M1-7  | H0000011467T00003 | red   |

|             |            |         |    |       |                   |       |
|-------------|------------|---------|----|-------|-------------------|-------|
| Surat Thani | Ban Na San | Nam Phu | M1 | M1-8  | H0000011505T00001 | green |
| Surat Thani | Ban Na San | Nam Phu | M1 | M1-9  | H0000010547T00002 | red   |
| Surat Thani | Ban Na San | Nam Phu | M1 | M1-10 | H0000011592T00003 | green |
| Surat Thani | Ban Na San | Nam Phu | M2 | M2-2  | H0000010623T00003 | red   |
| Surat Thani | Ban Na San | Nam Phu | M2 | M2-3  | H0000010449T00005 | green |
| Surat Thani | Ban Na San | Nam Phu | M2 | M2-4  | H0000010620T00003 | green |
| Surat Thani | Ban Na San | Nam Phu | M2 | M2-5  | H0000010489T00002 | green |
| Surat Thani | Ban Na San | Nam Phu | M2 | M2-6  | H0000010662T00016 | green |
| Surat Thani | Ban Na San | Nam Phu | M2 | M2-7  | H0000010656T00001 | green |
| Surat Thani | Ban Na San | Nam Phu | M2 | M2-8  | H0000010659T00005 | red   |
| Surat Thani | Ban Na San | Nam Phu | M2 | M2-9  | H0000010610T00003 | red   |
| Surat Thani | Ban Na San | Nam Phu | M2 | M2-10 | H0000010613T00001 | red   |
| Surat Thani | Ban Na San | Nam Phu | M3 | M3-6  | H0000010708T00002 | red   |
| Surat Thani | Ban Na San | Nam Phu | M3 | M3-7  | H0000010767T00003 | green |
| Surat Thani | Ban Na San | Nam Phu | M3 | M3-8  | H0000010765T00002 | red   |
| Surat Thani | Ban Na San | Nam Phu | M3 | M3-9  | H0000010713T00002 | red   |
| Surat Thani | Ban Na San | Nam Phu | M3 | M3-10 | H0000010723T00002 | red   |
| Surat Thani | Ban Na San | Nam Phu | M3 | M3-11 | H0000010731T00002 | green |
| Surat Thani | Ban Na San | Nam Phu | M3 | M3-12 | H0000010743T00001 | green |
| Surat Thani | Ban Na San | Nam Phu | M3 | M3-13 | H0000010703T00001 | green |
| Surat Thani | Ban Na San | Nam Phu | M4 | M4-8  | H0000010383T00001 | red   |
| Surat Thani | Ban Na San | Nam Phu | M4 | M4-9  | H0000010551T00001 | green |
| Surat Thani | Ban Na San | Nam Phu | M4 | M4-10 | H0000010516T00001 | red   |
| Surat Thani | Ban Na San | Nam Phu | M4 | M4-11 | H0000010481T00001 | green |
| Surat Thani | Ban Na San | Nam Phu | M4 | M4-12 | H0000010530T00001 | red   |
| Surat Thani | Ban Na San | Nam Phu | M5 | M5-11 | H0000010450T00001 | green |
| Surat Thani | Ban Na San | Nam Phu | M5 | M5-12 | H0000010523T00001 | red   |
| Surat Thani | Ban Na San | Nam Phu | M5 | M5-13 | H0000010444T00002 | green |
| Surat Thani | Ban Na San | Nam Phu | M5 | M5-14 | H0000010452T00003 | green |
| Surat Thani | Ban Na San | Nam Phu | M5 | M5-15 | H0000010502T00003 | green |



|             |            |         |    |       |                   |       |
|-------------|------------|---------|----|-------|-------------------|-------|
| Surat Thani | Ban Na San | Nam Phu | M5 | M5-16 | H0000010568T00002 | green |
| Surat Thani | Ban Na San | Nam Phu | M5 | M5-17 | H0000010444T00001 | green |
| Surat Thani | Ban Na San | Nam Phu | M6 | M6-14 | H0000010357T00003 | green |
| Surat Thani | Ban Na San | Nam Phu | M6 | M6-15 | H0000010324T00001 | red   |
| Surat Thani | Ban Na San | Nam Phu | M6 | M6-16 | H0000010339T00003 | red   |
| Surat Thani | Ban Na San | Nam Phu | M6 | M6-17 | H0000010241T00003 | red   |
| Surat Thani | Ban Na San | Nam Phu | M6 | M6-18 | H0000010323T00001 | green |
| Surat Thani | Ban Na San | Nam Phu | M6 | M6-19 | H0000010267T00005 | green |
| Surat Thani | Ban Na San | Nam Phu | M6 | M6-20 | H0000010347T00001 | green |
| Surat Thani | Ban Na San | Nam Phu | M6 | M6-21 | H0000010322T00001 | red   |
| Surat Thani | Ban Na San | Nam Phu | M1 | M1-11 | H0000010292T00003 | green |
| Surat Thani | Ban Na San | Nam Phu | M1 | M1-12 | n.d.              | green |
| Surat Thani | Ban Na San | Nam Phu | M1 | M1-13 | H0000011590T00001 | green |
| Surat Thani | Ban Na San | Nam Phu | M1 | M1-14 | H0000011592T00003 | red   |
| Surat Thani | Ban Na San | Nam Phu | M1 | M1-15 | H0000011467T00002 | green |
| Surat Thani | Ban Na San | Nam Phu | M1 | M1-16 | H0000011607T00003 | green |
| Surat Thani | Ban Na San | Nam Phu | M1 | M1-17 | H0000011505T00001 | green |
| Surat Thani | Ban Na San | Nam Phu | M2 | M2-11 | H0000010623T00003 | green |
| Surat Thani | Ban Na San | Nam Phu | M2 | M2-12 | H0000010648T00027 | green |
| Surat Thani | Ban Na San | Nam Phu | M2 | M2-13 | H0000010620T00003 | red   |
| Surat Thani | Ban Na San | Nam Phu | M2 | M2-14 | H0000010662T00016 | green |
| Surat Thani | Ban Na San | Nam Phu | M2 | M2-15 | H0000010656T00001 | red   |
| Surat Thani | Ban Na San | Nam Phu | M2 | M2-16 | H0000010659T00005 | red   |
| Surat Thani | Ban Na San | Nam Phu | M2 | M2-17 | n.d.              | red   |
| Surat Thani | Ban Na San | Nam Phu | M2 | M2-18 | H0000010658T00006 | red   |
| Surat Thani | Ban Na San | Nam Phu | M2 | M2-19 | H0000010661T00001 | green |
| Surat Thani | Ban Na San | Nam Phu | M2 | M2-20 | H0000010621T00004 | red   |
| Surat Thani | Ban Na San | Nam Phu | M2 | M2-21 | H0000010613T00001 | red   |
| Surat Thani | Ban Na San | Nam Phu | M2 | M2-22 | H0000011501T00001 | red   |
| Surat Thani | Ban Na San | Nam Phu | M2 | M2-23 | H0000010413T00001 | green |

|             |            |         |    |       |                   |       |
|-------------|------------|---------|----|-------|-------------------|-------|
| Surat Thani | Ban Na San | Nam Phu | M2 | M2-24 | H0000010625T00003 | red   |
| Surat Thani | Ban Na San | Nam Phu | M2 | M2-25 | H0000010619T00005 | red   |
| Surat Thani | Ban Na San | Nam Phu | M2 | M2-26 | H0000010641T00001 | red   |
| Surat Thani | Ban Na San | Nam Phu | M2 | M2-27 | H0000010669T00005 | red   |
| Surat Thani | Ban Na San | Nam Phu | M2 | M2-28 | H0000010655T00002 | red   |
| Surat Thani | Ban Na San | Nam Phu | M3 | M3-14 | H0000010708T00002 | green |
| Surat Thani | Ban Na San | Nam Phu | M3 | M3-15 | H0000010765T00002 | red   |
| Surat Thani | Ban Na San | Nam Phu | M3 | M3-16 | H0000010713T00001 | red   |
| Surat Thani | Ban Na San | Nam Phu | M3 | M3-17 | H0000010723T00002 | green |
| Surat Thani | Ban Na San | Nam Phu | M3 | M3-18 | H0000010731T00002 | green |
| Surat Thani | Ban Na San | Nam Phu | M4 | M4-13 | H0000010516T00001 | red   |
| Surat Thani | Ban Na San | Nam Phu | M4 | M4-14 | n.d.              | green |
| Surat Thani | Ban Na San | Nam Phu | M4 | M4-15 | H0000010435T00001 | red   |
| Surat Thani | Ban Na San | Nam Phu | M4 | M4-16 | H0000010530T00001 | red   |
| Surat Thani | Ban Na San | Nam Phu | M4 | M4-17 | n.d.              | red   |
| Surat Thani | Ban Na San | Nam Phu | M4 | M4-18 | H0000010461T00001 | green |
| Surat Thani | Ban Na San | Nam Phu | M4 | M4-19 | H0000010437T00001 | green |
| Surat Thani | Ban Na San | Nam Phu | M4 | M4-20 | H0000010305T00001 | red   |
| Surat Thani | Ban Na San | Nam Phu | M4 | M4-21 | H0000010546T00001 | red   |
| Surat Thani | Ban Na San | Nam Phu | M4 | M4-22 | n.d.              | green |
| Surat Thani | Ban Na San | Nam Phu | M5 | M5-18 | H0000010450T00001 | red   |
| Surat Thani | Ban Na San | Nam Phu | M5 | M5-19 | H0000010523T00001 | green |
| Surat Thani | Ban Na San | Nam Phu | M5 | M5-20 | H0000010452T00003 | red   |
| Surat Thani | Ban Na San | Nam Phu | M5 | M5-21 | H0000010502T00001 | red   |
| Surat Thani | Ban Na San | Nam Phu | M5 | M5-22 | H0000010455T00001 | red   |
| Surat Thani | Ban Na San | Nam Phu | M5 | M5-23 | H0000010568T00002 | green |
| Surat Thani | Ban Na San | Nam Phu | M5 | M5-24 | H0000010444T00001 | red   |
| Surat Thani | Ban Na San | Nam Phu | M6 | M6-22 | H0000010322T00001 | green |
| Surat Thani | Ban Na San | Nam Phu | M6 | M6-23 | H0000010323T00001 | green |
| Surat Thani | Ban Na San | Nam Phu | M6 | M6-24 | H0000010267T00002 | green |

|             |            |         |    |       |                   |     |
|-------------|------------|---------|----|-------|-------------------|-----|
| Surat Thani | Ban Na San | Nam Phu | M6 | M6-25 | H0000010347T00001 | red |
|-------------|------------|---------|----|-------|-------------------|-----|

---

<sup>a</sup>The numbers (M1-M6) indicate the location of village;

<sup>b</sup>Sample code shows the number of samples, collected in each village.

<sup>c</sup>QR code is generated and established by the NCS, ONCB.

n.d.: no data.

**Table S2.** Information relating to kratom plant samples which were collected during October 2019.

| Province    | District   | Subdistrict | Village | Sample code | QR code           | Leaf vein color | Girth (cm) | Origin of plant | Age (years) |
|-------------|------------|-------------|---------|-------------|-------------------|-----------------|------------|-----------------|-------------|
| Surat Thani | Ban Na San | Nam Phu     | M1      | M1-3        | H0000011525T00001 | green           | 20         | grafting        | 4 to 5      |
| Surat Thani | Ban Na San | Nam Phu     | M1      | M1-4        | H0000011596T00003 | green           | 35         | grafting        | 8 to 9      |
| Surat Thani | Ban Na San | Nam Phu     | M1      | M1-5        | H0000011527T00002 | green           | 30         | seedling        | 6 to 7      |
| Surat Thani | Ban Na San | Nam Phu     | M1      | M1-6        | H0000011590T00001 | green           | 43.18      | seedling        | 7           |
| Surat Thani | Ban Na San | Nam Phu     | M1      | M1-7        | H0000011467T00003 | red             | 57         | grafting        | 8 to 9      |
| Surat Thani | Ban Na San | Nam Phu     | M1      | M1-8        | H0000011505T00001 | green           | 68.58      | seedling        | 10          |
| Surat Thani | Ban Na San | Nam Phu     | M1      | M1-9        | H0000010547T00002 | red             | 16         | grafting        | 10          |
| Surat Thani | Ban Na San | Nam Phu     | M1      | M1-10       | H0000011592T00003 | green           | 20         | seedling        | 5 to 6      |
| Surat Thani | Ban Na San | Nam Phu     | M2      | M2-2        | H0000010623T00003 | red             | 33         | grafting        | 8           |
| Surat Thani | Ban Na San | Nam Phu     | M2      | M2-3        | H0000010449T00005 | green           | 31.75      | seedling        | 8           |
| Surat Thani | Ban Na San | Nam Phu     | M2      | M2-4        | H0000010620T00003 | green           | 32         | seedling        | 4           |
| Surat Thani | Ban Na San | Nam Phu     | M2      | M2-5        | H0000010489T00002 | green           | 38         | grafting        | 5           |
| Surat Thani | Ban Na San | Nam Phu     | M2      | M2-6        | H0000010662T00016 | green           | 95.55      | grafting        | 12          |
| Surat Thani | Ban Na San | Nam Phu     | M2      | M2-7        | H0000010656T00001 | green           | 40         | grafting        | 8           |
| Surat Thani | Ban Na San | Nam Phu     | M2      | M2-8        | H0000010659T00005 | red             | 53         | seedling        | 15          |
| Surat Thani | Ban Na San | Nam Phu     | M2      | M2-9        | H0000010610T00003 | red             | 20         | grafting        | 5           |
| Surat Thani | Ban Na San | Nam Phu     | M2      | M2-10       | H0000010613T00001 | red             | 15         | seedling        | 4           |
| Surat Thani | Ban Na San | Nam Phu     | M3      | M3-6        | H0000010708T00002 | red             | 31         | grafting        | 4           |
| Surat Thani | Ban Na San | Nam Phu     | M3      | M3-7        | H0000010767T00003 | green           | 40         | seedling        | n.d.        |
| Surat Thani | Ban Na San | Nam Phu     | M3      | M3-8        | H0000010765T00002 | red             | 36         | seedling        | 4           |
| Surat Thani | Ban Na San | Nam Phu     | M3      | M3-9        | H0000010713T00002 | red             | 41         | cutting         | 4           |
| Surat Thani | Ban Na San | Nam Phu     | M3      | M3-10       | H0000010723T00002 | red             | 28         | seedling        | 3           |
| Surat Thani | Ban Na San | Nam Phu     | M3      | M3-11       | H0000010731T00002 | green           | 40         | seedling        | 3           |
| Surat Thani | Ban Na San | Nam Phu     | M3      | M3-12       | H0000010743T00001 | green           | 31         | seedling        | 3           |
| Surat Thani | Ban Na San | Nam Phu     | M3      | M3-13       | H0000010703T00001 | green           | 17.78      | seedling        | 7           |
| Surat Thani | Ban Na San | Nam Phu     | M4      | M4-8        | H0000010383T00001 | red             | 28.5       | seedling        | 12          |

|             |            |         |    |       |                   |       |       |          |      |
|-------------|------------|---------|----|-------|-------------------|-------|-------|----------|------|
| Surat Thani | Ban Na San | Nam Phu | M4 | M4-9  | H0000010551T00001 | green | 55.83 | seedling | n.d. |
| Surat Thani | Ban Na San | Nam Phu | M4 | M4-10 | H0000010516T00001 | red   | 61    | grafting | 22   |
| Surat Thani | Ban Na San | Nam Phu | M4 | M4-11 | H0000010481T00001 | green | 80    | seedling | 60   |
| Surat Thani | Ban Na San | Nam Phu | M4 | M4-12 | H0000010530T00001 | red   | 20.5  | grafting | 10   |
| Surat Thani | Ban Na San | Nam Phu | M5 | M5-11 | H0000010450T00001 | green | 86    | seedling | 12   |
| Surat Thani | Ban Na San | Nam Phu | M5 | M5-12 | H0000010523T00001 | red   | 42    | grafting | 5    |
| Surat Thani | Ban Na San | Nam Phu | M5 | M5-13 | H0000010444T00002 | green | 10.16 | seedling | 4    |
| Surat Thani | Ban Na San | Nam Phu | M5 | M5-14 | H0000010452T00003 | green | 66    | seedling | 11   |
| Surat Thani | Ban Na San | Nam Phu | M5 | M5-15 | H0000010502T00003 | green | 35.56 | seedling | 9    |
| Surat Thani | Ban Na San | Nam Phu | M5 | M5-16 | H0000010568T00002 | green | 85    | grafting | 7    |
| Surat Thani | Ban Na San | Nam Phu | M5 | M5-17 | H0000010444T00001 | green | 62    | seedling | 24   |
| Surat Thani | Ban Na San | Nam Phu | M6 | M6-14 | H0000010357T00003 | green | 39.2  | seedling | 8    |
| Surat Thani | Ban Na San | Nam Phu | M6 | M6-15 | H0000010324T00001 | red   | 49.2  | seedling | 10   |
| Surat Thani | Ban Na San | Nam Phu | M6 | M6-16 | H0000010339T00003 | red   | 37.5  | seedling | 6    |
| Surat Thani | Ban Na San | Nam Phu | M6 | M6-17 | H0000010241T00003 | red   | 28.2  | seedling | 4    |
| Surat Thani | Ban Na San | Nam Phu | M6 | M6-18 | H0000010323T00001 | green | 22.5  | seedling | 3    |
| Surat Thani | Ban Na San | Nam Phu | M6 | M6-19 | H0000010267T00005 | green | 16    | seedling | 4    |
| Surat Thani | Ban Na San | Nam Phu | M6 | M6-20 | H0000010347T00001 | green | 55.83 | grafting | 7    |
| Surat Thani | Ban Na San | Nam Phu | M6 | M6-21 | H0000010322T00001 | red   | 51.3  | seedling | 7    |



**Table S3.** Set 2 of samples, collected from the southern, northern and central regions, provided by the Narcotic Crop Survey and Monitoring Institute (NCS), the Office of Narcotic Control Board (ONCB).

| Province            | District        | Subdistrict  | Village <sup>a</sup> | Sample code <sup>b</sup> | QR code <sup>c</sup> | Leaf vein color |
|---------------------|-----------------|--------------|----------------------|--------------------------|----------------------|-----------------|
| Chiangmai           | Muang Chiangmai | Chang Phueak | M5                   | CM-PS1                   | H0000000000000001    | green           |
| Chiangmai           | Maetaeng        | San Mahaphon | M3                   | CM-SM1                   | n.d.                 | n.d.            |
| Chumphon            | Muang Chumphon  | Bang Mak     | M6                   | C-BM1                    | H0000005676T00001    | green           |
| Chumphon            | Muang Chumphon  | Bang Mak     | M6                   | C-BM2                    | H0000004203T00001    | green           |
| Chumphon            | Muang Chumphon  | Bang Mak     | M6                   | C-BM3                    | H0000005460T00001    | green           |
| Chumphon            | Muang Chumphon  | Bang Mak     | M6                   | C-BM4                    | H0000005985T00001    | green           |
| Chumphon            | Muang Chumphon  | Bang Mak     | M6                   | C-BM5                    | H0000005975T00002    | red             |
| Chumphon            | Muang Chumphon  | Bang Mak     | M6                   | C-BM6                    | H0000005651T00003    | red             |
| Chumphon            | Muang Chumphon  | Bang Mak     | M6                   | C-BM7                    | H0000004261T00001    | green           |
| Chumphon            | Muang Chumphon  | Bang Mak     | M6                   | C-BM8                    | H0000005592T00001    | green           |
| Chumphon            | Muang Chumphon  | Bang Mak     | M6                   | C-BM9                    | H0000005614T00001    | red             |
| Chumphon            | Muang Chumphon  | Bang Mak     | M6                   | C-BM10                   | H0000005634T00001    | green           |
| Lamphun             | Muang Lamphun   | Pratu Pa     | M5                   | LP-PL1                   | n.d.                 | n.d.            |
| Lamphun             | Muang Lamphun   | Rimping      | M2                   | LP-RL1                   | n.d.                 | n.d.            |
| Lamphun             | Muang Lamphun   | Rimping      | M4                   | LP-RL2                   | n.d.                 | n.d.            |
| Nakhon Si Thammarat | Tham Phannara   | Khlung Sae   | M1                   | N-KT1                    | H0000006727T00001    | green           |
| Nakhon Si Thammarat | Tham Phannara   | Khlung Sae   | M2                   | N-KT2                    | H0000004589T00001    | n.d.            |
| Nakhon Si Thammarat | Tham Phannara   | Khlung Sae   | M3                   | N-KT3                    | H0000008365T00001    | green           |
| Nakhon Si Thammarat | Tham Phannara   | Khlung Sae   | M4                   | N-KT4                    | H0000007138T00001    | green           |
| Nakhon Si Thammarat | Tham Phannara   | Khlung Sae   | M5                   | N-KT5                    | H0000005629T00001    | red             |
| Nakhon Si Thammarat | Tham Phannara   | Khlung Sae   | M5                   | N-KT6                    | H0000004893T00001    | red             |
| Nakhon Si Thammarat | Tham Phannara   | Khlung Sae   | M6                   | N-KT7                    | H0000006734T00001    | red             |
| Nakhon Si Thammarat | Tham Phannara   | Khlung Sae   | M6                   | N-KT8                    | H0000006776T00002    | red             |
| Nakhon Si Thammarat | Tham Phannara   | Khlung Sae   | M7                   | N-KT9                    | H0000006260T00001    | n.d.            |

|                     |               |            |     |         |                   |       |
|---------------------|---------------|------------|-----|---------|-------------------|-------|
| Nakhon Si Thammarat | Tham Phannara | Khlong Sae | M8  | N-KT10  | H0000006080T00002 | green |
| Nonthaburi          | Sai Noi       | Sai Yai    | M10 | NT-SS1  | H0000000100T00002 | green |
| Nonthaburi          | Sai Noi       | Sai Yai    | M10 | NT-SS2  | H0000000294T00001 | green |
| Nonthaburi          | Sai Noi       | Sai Yai    | M10 | NT-SS3  | H0000000316T00004 | green |
| Nonthaburi          | Sai Noi       | Sai Yai    | M10 | NT-SS4  | H0000000335T00002 | green |
| Nonthaburi          | Sai Noi       | Sai Yai    | M10 | NT-SS5  | H0000000227T00002 | green |
| Nonthaburi          | Sai Noi       | Sai Yai    | M10 | NT-SS6  | H0000000262T00002 | green |
| Nonthaburi          | Sai Noi       | Sai Yai    | M10 | NT-SS7  | H0000000159T00003 | green |
| Nonthaburi          | Sai Noi       | Sai Yai    | M10 | NT-SS8  | H0000000132T00012 | green |
| Nonthaburi          | Sai Noi       | Sai Yai    | M10 | NT-SS9  | H0000000367T00003 | green |
| Nonthaburi          | Sai Noi       | Sai Yai    | M10 | NT-SS10 | H0000000258T00001 | green |
| Pathum Thani        | Khlong Luang  | Khlong Sam | M12 | PT-KK1  | H0000000091T00003 | green |
| Pathum Thani        | Khlong Luang  | Khlong Sam | M12 | PT-KK2  | H0000000121T00002 | green |
| Pathum Thani        | Khlong Luang  | Khlong Sam | M12 | PT-KK3  | H0000000379T00001 | green |
| Pathum Thani        | Khlong Luang  | Khlong Sam | M12 | PT-KK4  | H0000000095T00001 | green |
| Pathum Thani        | Khlong Luang  | Khlong Sam | M12 | PT-KK5  | H0000000255T00001 | green |
| Pathum Thani        | Khlong Luang  | Khlong Sam | M12 | PT-KK6  | H0000000127T00014 | green |
| Pathum Thani        | Khlong Luang  | Khlong Sam | M12 | PT-KK7  | H0000000115T00003 | red   |
| Pathum Thani        | Khlong Luang  | Khlong Sam | M12 | PT-KK8  | H0000000141T00001 | green |
| Pathum Thani        | Khlong Luang  | Khlong Sam | M12 | PT-KK9  | H0000000349T00002 | green |
| Pathum Thani        | Khlong Luang  | Khlong Sam | M12 | PT-KK10 | H0000000208T00001 | red   |
| Phangnga            | Thai Mueang   | Lampi      | M1  | PH-LT1  | H0000005305T00001 | red   |
| Phangnga            | Thai Mueang   | Lampi      | M1  | PH-LT2  | H0000005466T00001 | red   |
| Phangnga            | Thai Mueang   | Lampi      | M2  | PH-LT3  | H0000004491T00001 | red   |
| Phangnga            | Thai Mueang   | Lampi      | M3  | PH-LT4  | H0000006444T00001 | green |
| Phangnga            | Thai Mueang   | Lampi      | M3  | PH-LT5  | H0000008303T00001 | red   |
| Phangnga            | Thai Mueang   | Lampi      | M4  | PH-LT6  | H0000005569T00002 | green |
| Phangnga            | Thai Mueang   | Lampi      | M5  | PH-LT7  | H0000006799T00001 | green |

|             |                  |              |     |         |                   |       |
|-------------|------------------|--------------|-----|---------|-------------------|-------|
| Phangnga    | Thai Mueang      | Lampi        | M5  | PH-LT8  | H0000007326T00001 | green |
| Phangnga    | Thai Mueang      | Lampi        | M6  | PH-LT9  | H0000005838T00001 | n.d.  |
| Phangnga    | Thai Mueang      | Lampi        | M7  | PH-LT10 | H0000006106T00001 | green |
| Phatthalung | Srinakarin       | Lamsin       | M9  | P-LS1   | H0000001334T00001 | green |
| Phatthalung | Srinakarin       | Lamsin       | M4  | P-LS2   | H0000000782T00001 | red   |
| Phatthalung | Srinakarin       | Lamsin       | M5  | P-LS3   | H0000001154T00001 | green |
| Phatthalung | Srinakarin       | Lamsin       | M3  | P-LS4   | H0000000840T00001 | green |
| Phatthalung | Srinakarin       | Lamsin       | M1  | P-LS5   | n.d.              | red   |
| Phatthalung | Srinakarin       | Lamsin       | M3  | P-LS6   | n.d.              | green |
| Phatthalung | Srinakarin       | Lamsin       | M8  | P-LS7   | H0000001029T00002 | green |
| Phatthalung | Srinakarin       | Lamsin       | M6  | P-LS8   | H0000001060T00002 | green |
| Phatthalung | Srinakarin       | Lamsin       | M2  | P-LS9   | H0000000909T00001 | green |
| Phatthalung | Srinakarin       | Lamsin       | M7  | P-LS10  | H0000001275T00001 | green |
| Phetchabun  | Muang Phetchabun | Wang Chompoo | M1  | PB-WM1  | H0000011695T00015 | red   |
| Phetchabun  | Muang Phetchabun | Wang Chompoo | M2  | PB-WM2  | H00000117T00004   | red   |
| Phetchabun  | Muang Phetchabun | Wang Chompoo | M4  | PB-WM3  | H0000011629T00001 | green |
| Phetchabun  | Muang Phetchabun | Wang Chompoo | M4  | PB-WM4  | H0000011620T00001 | green |
| Phetchabun  | Muang Phetchabun | Wang Chompoo | M5  | PB-WM5  | H0000011779T00001 | red   |
| Phetchabun  | Muang Phetchabun | Wang Chompoo | M6  | PB-WM6  | H0000011815T00002 | green |
| Phetchabun  | Muang Phetchabun | Wang Chompoo | M7  | PB-WM7  | n.d.              | n.d.  |
| Phetchabun  | Muang Phetchabun | Wang Chompoo | M7  | PB-WM8  | H0000011786T00001 | red   |
| Phetchabun  | Muang Phetchabun | Wang Chompoo | M8  | PB-WM9  | n.d.              | green |
| Phetchabun  | Muang Phetchabun | Wang Chompoo | M10 | PB-WM10 | H0000011830T00001 | green |
| Phetchabun  | Muang Phetchabun | Wang Chompoo | M11 | PB-WM11 | H0000011657T00001 | green |
| Phetchabun  | Muang Phetchabun | Wang Chompoo | M12 | PB-WM12 | H0000011723T00001 | red   |
| Phetchabun  | Muang Phetchabun | Wang Chompoo | M12 | PB-WM13 | H0000011725T00001 | red   |
| Phetchabun  | Muang Phetchabun | Wang Chompoo | M13 | PB-WM14 | n.d.              | green |
| Phetchabun  | Muang Phetchabun | Wang Chompoo | M14 | PB-WM15 | H0000011725T00001 | green |

|                     |                  |              |     |         |                   |       |
|---------------------|------------------|--------------|-----|---------|-------------------|-------|
| Phetchabun          | Muang Phetchabun | Wang Chompoo | M14 | PB-WM16 | n.d.              | green |
| Prachuap Khiri Khan | Bang Saphan Noi  | Chang Raek   | M3  | PJ-CB1  | H0000011074T00001 | n.d.  |
| Prachuap Khiri Khan | Bang Saphan Noi  | Chang Raek   | M6  | PJ-CB2  | H0000001133T00001 | n.d.  |
| Prachuap Khiri Khan | Bang Saphan Noi  | Chang Raek   | M8  | PJ-CB3  | H0000010941T00001 | n.d.  |
| Prachuap Khiri Khan | Bang Saphan Noi  | Chang Raek   | M2  | PJ-CB4  | H0000011212T00002 | n.d.  |
| Prachuap Khiri Khan | Bang Saphan Noi  | Chang Raek   | M7  | PJ-CB5  | H0000011036T00001 | n.d.  |
| Prachuap Khiri Khan | Bang Saphan Noi  | Chang Raek   | M8  | PJ-CB6  | H0000011379T00002 | n.d.  |
| Prachuap Khiri Khan | Bang Saphan Noi  | Chang Raek   | M1  | PJ-CB7  | H0000010918T00001 | n.d.  |
| Prachuap Khiri Khan | Bang Saphan Noi  | Chang Raek   | M5  | PJ-CB8  | H0000011231T00002 | n.d.  |
| Prachuap Khiri Khan | Bang Saphan Noi  | Chang Raek   | M7  | PJ-CB9  | H0000010978T00002 | n.d.  |
| Prachuap Khiri Khan | Bang Saphan Noi  | Chang Raek   | M4  | PJ-CB10 | H0000011106T00001 | n.d.  |
| Ranong              | Laun             | Laun Nuea    | M1  | R-LL1   | H0000001374T00003 | green |
| Ranong              | Laun             | Laun Nuea    | M1  | R-LL2   | H0000001381T00002 | green |
| Ranong              | Laun             | Laun Nuea    | M2  | R-LL3   | H0000004067T00004 | red   |
| Ranong              | Laun             | Laun Nuea    | M2  | R-LL4   | H0000004063T00001 | red   |
| Ranong              | Laun             | Laun Nuea    | M3  | R-LL5   | H0000004028T00002 | red   |
| Ranong              | Laun             | Laun Nuea    | M3  | R-LL6   | H0000006529T00003 | red   |
| Ranong              | Laun             | Laun Nuea    | M4  | R-LL7   | H0000004233T00002 | red   |
| Ranong              | Laun             | Laun Nuea    | M4  | R-LL8   | H0000003523T00001 | green |
| Ranong              | Laun             | Laun Nuea    | M5  | R-LL9   | H0000001436T00001 | red   |
| Ranong              | Laun             | Laun Nuea    | M5  | R-LL10  | H0000001400T00001 | red   |
| Ranong              | Laun             | Laun Nuea    | M4  | R-LL11  | H0000003526T00001 | green |
| Surat Thani         | Ban Na San       | Khlung Prap  | M1  | S-KPN1  | H0000006172T00001 | red   |
| Surat Thani         | Ban Na San       | Khlung Prap  | M1  | S-KPN2  | H0000006254T00001 | green |
| Surat Thani         | Ban Na San       | Khlung Prap  | M2  | S-KPN3  | H0000001837T00001 | red   |
| Surat Thani         | Ban Na San       | Khlung Prap  | M2  | S-KPN4  | H0000001757T00001 | red   |
| Surat Thani         | Ban Na San       | Khlung Prap  | M3  | S-KPN5  | H0000002018T00001 | green |
| Surat Thani         | Ban Na San       | Khlung Prap  | M3  | S-KPN6  | H0000002024T00001 | green |

|             |            |             |    |         |                   |       |
|-------------|------------|-------------|----|---------|-------------------|-------|
| Surat Thani | Ban Na San | Khlong Prap | M4 | S-KPN7  | H0000001802T00001 | red   |
| Surat Thani | Ban Na San | Khlong Prap | M4 | S-KPN8  | H0000001816T00001 | red   |
| Surat Thani | Ban Na San | Khlong Prap | M5 | S-KPN9  | H0000006514T00002 | red   |
| Surat Thani | Ban Na San | Khlong Prap | M5 | S-KPN10 | H0000008464T00001 | red   |
| Surat Thani | Ban Na San | Khuan Si    | M1 | S-KSN1  | H0000002999T00003 | green |
| Surat Thani | Ban Na San | Khuan Si    | M1 | S-KSN2  | H0000003026T00001 | green |
| Surat Thani | Ban Na San | Khuan Si    | M2 | S-KSN3  | H0000001895T00001 | green |
| Surat Thani | Ban Na San | Khuan Si    | M3 | S-KSN4  | H0000002550T00002 | red   |
| Surat Thani | Ban Na San | Khuan Si    | M4 | S-KSN5  | H0000002111T00001 | green |
| Surat Thani | Ban Na San | Khuan Si    | M5 | S-KSN6  | H0000002377T00001 | green |
| Surat Thani | Ban Na San | Khuan Si    | M6 | S-KSN7  | H0000001756T00002 | green |
| Surat Thani | Ban Na San | Khuan Si    | M7 | S-KSN8  | H0000001687T00001 | green |
| Surat Thani | Ban Na San | Khuan Si    | M7 | S-KSN9  | H0000001616T00001 | red   |
| Surat Thani | Ban Na San | Khuan Si    | M8 | S-KSN10 | H0000008449T00001 | green |
| Surat Thani | Ban Na San | Kuan Suban  | M1 | S-KBN1  | H0000005799T00003 | n.d.  |
| Surat Thani | Ban Na San | Kuan Suban  | M2 | S-KBN2  | H0000008444T00001 | n.d.  |
| Surat Thani | Ban Na San | Kuan Suban  | M2 | S-KBN3  | H0000008666T00002 | n.d.  |
| Surat Thani | Ban Na San | Kuan Suban  | M3 | S-KBN4  | H0000006842T00001 | n.d.  |
| Surat Thani | Ban Na San | Kuan Suban  | M3 | S-KBN5  | H0000009602T00001 | n.d.  |
| Surat Thani | Ban Na San | Kuan Suban  | M4 | S-KBN6  | H0000010190T00001 | n.d.  |
| Surat Thani | Ban Na San | Kuan Suban  | M4 | S-KBN7  | H0000008875T00001 | n.d.  |
| Surat Thani | Ban Na San | Kuan Suban  | M5 | S-KBN8  | H0000005028T00001 | n.d.  |
| Surat Thani | Ban Na San | Kuan Suban  | M6 | S-KBN9  | H0000003865T00001 | n.d.  |
| Surat Thani | Ban Na San | Kuan Suban  | M7 | S-KBN10 | H0000008826T00001 | n.d.  |
| Surat Thani | Ban Na San | Lamphun     | M1 | S-LN1   | H0000003744T00002 | green |
| Surat Thani | Ban Na San | Lamphun     | M1 | S-LN2   | H0000003713T00001 | green |
| Surat Thani | Ban Na San | Lamphun     | M2 | S-LN3   | H0000006690T00002 | n.d.  |
| Surat Thani | Ban Na San | Lamphun     | M3 | S-LN4   | H0000004817T00002 | green |



|             |            |                       |    |        |                   |       |
|-------------|------------|-----------------------|----|--------|-------------------|-------|
| Surat Thani | Ban Na San | Lamphun               | M3 | S-LN5  | H0000004857T00002 | green |
| Surat Thani | Ban Na San | Lamphun               | M4 | S-LN6  | H0000005025T00001 | n.d.  |
| Surat Thani | Ban Na San | Lamphun               | M5 | S-LN7  | H0000003317T00001 | green |
| Surat Thani | Ban Na San | Lamphun               | M6 | S-LN8  | H0000003418T00001 | red   |
| Surat Thani | Ban Na San | Lamphun               | M7 | S-LN9  | H0000009966T00002 | n.d.  |
| Surat Thani | Ban Na San | Lamphun               | M7 | S-LN10 | H0000002774T00003 | n.d.  |
| Surat Thani | Ban Na San | Nam Phu               | M1 | S-NN1  | H0000011503T00004 | green |
| Surat Thani | Ban Na San | Nam Phu               | M1 | S-NN2  | H0000011531T00001 | green |
| Surat Thani | Ban Na San | Nam Phu               | M2 | S-NN3  | H0000010561T00001 | green |
| Surat Thani | Ban Na San | Nam Phu               | M2 | S-NN4  | H0000010446T00003 | green |
| Surat Thani | Ban Na San | Nam Phu               | M3 | S-NN5  | H0000010766T00001 | green |
| Surat Thani | Ban Na San | Nam Phu               | M4 | S-NN6  | H0000010458T00001 | green |
| Surat Thani | Ban Na San | Nam Phu               | M4 | S-NN7  | H0000010546T00002 | green |
| Surat Thani | Ban Na San | Nam Phu               | M5 | S-NN8  | H0000010479T00003 | red   |
| Surat Thani | Ban Na San | Nam Phu               | M6 | S-NN9  | H0000010221T00001 | green |
| Surat Thani | Ban Na San | Nam Phu               | M6 | S-NN10 | H0000010269T00002 | green |
| Surat Thani | Ban Na San | Nasan<br>municipality |    | S-MN1  | H0000009892T00001 | n.d.  |
| Surat Thani | Ban Na San | Nasan<br>municipality |    | S-MN2  | H0000009283T00001 | green |
| Surat Thani | Ban Na San | Nasan<br>municipality |    | S-MN3  | H0000005826T00003 | green |
| Surat Thani | Ban Na San | Nasan<br>municipality |    | S-MN4  | H0000007449T00001 | red   |
| Surat Thani | Ban Na San | Nasan<br>municipality |    | S-MN5  | H0000009522T00002 | red   |
| Surat Thani | Ban Na San | Nasan<br>municipality |    | S-MN6  | H0000008774T00001 | red   |
| Surat Thani | Ban Na San | Nasan<br>municipality |    | S-MN7  | H0000008984T00001 | red   |

|             |            |                    |    |         |                   |       |
|-------------|------------|--------------------|----|---------|-------------------|-------|
| Surat Thani | Ban Na San | Nasan municipality |    | S-MN8   | H0000008622T00001 | green |
| Surat Thani | Ban Na San | Nasan municipality |    | S-MN9   | H0000007801T00001 | green |
| Surat Thani | Ban Na San | Nasan municipality |    | S-MN10  | H0000009530T00001 | green |
| Surat Thani | Ban Na San | Permphun Sub       | M1 | S-PPN1  | H0000003248T00001 | n.d.  |
| Surat Thani | Ban Na San | Permphun Sub       | M1 | S-PPN2  | H0000009803T00001 | n.d.  |
| Surat Thani | Ban Na San | Permphun Sub       | M2 | S-PPN3  | H0000008093T00001 | n.d.  |
| Surat Thani | Ban Na San | Permphun Sub       | M3 | S-PPN4  | H0000004990T00003 | n.d.  |
| Surat Thani | Ban Na San | Permphun Sub       | M3 | S-PPN5  | H0000004941T00003 | n.d.  |
| Surat Thani | Ban Na San | Permphun Sub       | M4 | S-PPN6  | H0000008160T00002 | n.d.  |
| Surat Thani | Ban Na San | Permphun Sub       | M4 | S-PPN7  | H0000008169T00001 | n.d.  |
| Surat Thani | Ban Na San | Permphun Sub       | M5 | S-PPN8  | H0000003380T00001 | n.d.  |
| Surat Thani | Ban Na San | Permphun Sub       | M6 | S-PPN9  | H0000006428T00001 | n.d.  |
| Surat Thani | Ban Na San | Permphun Sub       | M6 | S-PPN10 | H0000009101T00002 | n.d.  |
| Surat Thani | Ban Na San | Phru Phi           | M1 | S-PN1   | H0000002917T00004 | green |
| Surat Thani | Ban Na San | Phru Phi           | M2 | S-PN2   | H0000003134T00001 | green |
| Surat Thani | Ban Na San | Phru Phi           | M3 | S-PN3   | H0000003200T00002 | green |
| Surat Thani | Ban Na San | Phru Phi           | M3 | S-PN4   | H0000003192T00002 | green |
| Surat Thani | Ban Na San | Phru Phi           | M4 | S-PN5   | H0000003049T00001 | red   |
| Surat Thani | Ban Na San | Phru Phi           | M5 | S-PN6   | H0000002297T00001 | red   |
| Surat Thani | Ban Na San | Phru Phi           | M5 | S-PN7   | H0000001393T00001 | red   |
| Surat Thani | Ban Na San | Phru Phi           | M6 | S-PN8   | H0000002825T00001 | red   |
| Surat Thani | Ban Na San | Phru Phi           | M7 | S-PN9   | H0000003506T00001 | red   |
| Surat Thani | Ban Na San | Phru Phi           | M7 | S-PN10  | H0000009631T00001 | green |
| Surat Thani | Ban Na San | Tha Chi            | M1 | S-TCN1  | H0000002566T00002 | red   |
| Surat Thani | Ban Na San | Tha Chi            | M1 | S-TCN2  | H0000002465T00002 | red   |
| Surat Thani | Ban Na San | Tha Chi            | M2 | S-TCN3  | H0000003477T00001 | red   |

|             |            |               |    |         |                   |       |
|-------------|------------|---------------|----|---------|-------------------|-------|
| Surat Thani | Ban Na San | Tha Chi       | M2 | S-TCN4  | H0000002148T00001 | red   |
| Surat Thani | Ban Na San | Tha Chi       | M3 | S-TCN5  | H0000002516T00001 | green |
| Surat Thani | Ban Na San | Tha Chi       | M3 | S-TCN6  | H0000002826T00003 | green |
| Surat Thani | Ban Na San | Tha Chi       | M4 | S-TCN7  | H0000004007T00002 | green |
| Surat Thani | Ban Na San | Tha Chi       | M4 | S-TCN8  | H0000003734T00002 | green |
| Surat Thani | Ban Na San | Tha Chi       | M5 | S-TCN9  | H0000002638T00003 | red   |
| Surat Thani | Ban Na San | Tha Chi       | M6 | S-TCN10 | H0000003647T00001 | red   |
| Surat Thani | Ban Na San | Thung Tao     | M1 | S-TTN1  | H0000007661T00002 | red   |
| Surat Thani | Ban Na San | Thung Tao     | M1 | S-TTN2  | H0000006964T00001 | red   |
| Surat Thani | Ban Na San | Thung Tao     | M2 | S-TTN3  | H0000004870T00001 | green |
| Surat Thani | Ban Na San | Thung Tao     | M2 | S-TTN4  | H0000005172T00002 | green |
| Surat Thani | Ban Na San | Thung Tao     | M3 | S-TTN5  | H0000005733T00003 | green |
| Surat Thani | Ban Na San | Thung Tao     | M3 | S-TTN6  | H0000005701T00002 | green |
| Surat Thani | Ban Na San | Thung Tao     | M4 | S-TTN7  | H0000003949T00002 | green |
| Surat Thani | Ban Na San | Thung Tao     | M4 | S-TTN8  | H0000003540T00002 | green |
| Surat Thani | Ban Na San | Thung Tao     | M5 | S-TTN9  | H0000006889T00001 | green |
| Surat Thani | Ban Na San | Thung Tao     | M5 | S-TTN10 | H0000003742T00002 | green |
| Surat Thani | Ban Na San | Thung Tao Mai | M1 | S-TMN1  | H0000003940T00001 | red   |
| Surat Thani | Ban Na San | Thung Tao Mai | M2 | S-TMN2  | H0000007422T00001 | red   |
| Surat Thani | Ban Na San | Thung Tao Mai | M3 | S-TMN3  | H0000005395T00001 | red   |
| Surat Thani | Ban Na San | Thung Tao Mai | M3 | S-TMN4  | H0000004570T00001 | green |
| Surat Thani | Ban Na San | Thung Tao Mai | M4 | S-TMN5  | H0000003759T00002 | green |
| Surat Thani | Ban Na San | Thung Tao Mai | M4 | S-TMN6  | H0000009638T00001 | green |
| Surat Thani | Ban Na San | Thung Tao Mai | M5 | S-TMN7  | H0000007289T00001 | n.d.  |
| Surat Thani | Ban Na San | Thung Tao Mai | M6 | S-TMN8  | H0000003881T00001 | red   |
| Surat Thani | Ban Na San | Thung Tao Mai | M7 | S-TMN9  | H0000007040T00001 | green |
| Surat Thani | Ban Na San | Thung Tao Mai | M8 | S-TMN10 | H0000006626T00001 | green |
| Surat Thani | Ban Na San | Thung Tao Mai | M3 | S-TMN11 | H0000004620T00001 | green |

|       |          |         |    |        |                   |       |
|-------|----------|---------|----|--------|-------------------|-------|
| Trang | Huai yot | Nai Tao | M3 | T-NH1  | H0000000582T00002 | green |
| Trang | Huai yot | Nai Tao | M2 | T-NH2  | H0000000488T00002 | green |
| Trang | Huai yot | Nai Tao | M3 | T-NH3  | H0000000112T00001 | green |
| Trang | Huai yot | Nai Tao | M1 | T-NH4  | H0000000461T00003 | green |
| Trang | Huai yot | Nai Tao | M2 | T-NH5  | H0000000514T00001 | red   |
| Trang | Huai yot | Nai Tao | M1 | T-NH6  | H0000000477T00001 | green |
| Trang | Huai yot | Nai Tao | M3 | T-NH7  | H0000001112T00002 | green |
| Trang | Huai yot | Nai Tao | M1 | T-NH8  | H0000000397T00001 | green |
| Trang | Huai yot | Nai Tao | M4 | T-NH9  | H0000000672T00001 | red   |
| Trang | Huai yot | Nai Tao | M4 | T-NH10 | H0000000714T00003 | green |

<sup>a</sup>The numbers indicate the location of village;

<sup>b</sup>Sample code shows the number of samples, collected in each village.

<sup>c</sup>QR code is generated and established by the NCS, ONCB.

n.d.: no data.
